# Supplementary material for: uhrf1 and dnmt1 Loss Induces an Immune Response in Zebrafish Livers Due to Viral Mimicry by Transposable Elements
Source: Front Immunol. 2021 Mar 29;12:627926. doi: 10.3389/fimmu.2021.627926 (PMC8039153; doi:10.3389/fimmu.2021.627926)
Supplement: Supplementary file 13 [file Table_4.xlsx]

## Sheet: Sheet1
ensembl_id	baseMean_hi272	baseMean_dnmt1	log2FC_hi272	padj_hi272	log2FC_dnmt1	padj_dnmt1	hi272_sib1	hi272_sib2	hi272_sib3	hi272_sib4	hi272_sib5	dnmt1_sib1	dnmt1_sib2	dnmt1_sib3	hi272_mut1	hi272_mut2	hi272_mut3	hi272_mut4	hi272_mut5	dnmt1_mut1	dnmt1_mut2	dnmt1_mut3	zfin_gene_id	human_ensembl_id	human_gene_id
ENSDARG00000004325	55.6981	133.161	1.65772	9.06742e-14	1.37108	0.000825412	31.7596	25.471	28.8954	19.1751	29.4143	60.1251	70.0314	85.6919	85.6022	80.1364	92.9578	90.8562	72.7132	111.64	204.58	266.896	casp9	ENSG00000132906	CASP9
ENSDARG00000009511	1.3224	3.84836	3.77074	0.0231224	1.56342	0.148515	0	0	0	0	0	1.11343	0	2.63667	0	1.33561	3.84123	2.55933	5.48779	3.4617	4.75768	11.1207	tnfa	ENSG00000232810	TNF
ENSDARG00000013598	19.5511	36.3591	4.96553	4.46881e-13	3.25015	1.34113e-10	0.992487	2.31554	0	2.61479	0	3.34029	9.4072	3.95501	42.8011	46.7462	30.7299	28.1526	41.1584	64.0414	80.8806	56.5302	tnfb	ENSG00000232810	TNF
ENSDARG00000017037	179.249	333.795	0.674344	1.63823e-06	0.568959	0.0358657	131.008	148.195	133.363	145.557	130.843	250.521	261.311	291.353	221.71	198.338	214.341	248.255	220.883	387.71	340.174	471.702	ikbkg	ENSG00000269335	IKBKG
ENSDARG00000018569	295.451	652.292	1.82064	1.3035e-34	1.07467	0.000323618	142.918	128.513	151.145	114.179	114.614	302.853	417.053	524.698	425.443	416.709	430.986	518.264	511.736	729.553	928.541	1011.06	tnfrsf1a	ENSG00000067182	TNFRSF1A
ENSDARG00000021239	103.414	159.869	1.32351	6.20518e-11	0.80973	0.0222892	77.414	48.6264	48.8999	60.1402	58.8287	85.734	133.791	125.242	166.924	140.239	117.542	171.475	144.054	156.642	225.197	232.608	apaf1	ENSG00000120868	APAF1
ENSDARG00000027777	192.144	299.068	3.00918	2.87729e-42	3.06363	2.68488e-43	37.7145	50.942	61.1248	39.2219	24.3429	64.5788	62.7147	58.0068	286.767	321.213	393.342	377.501	329.267	531.371	555.063	522.672	tnfaip3	ENSG00000118503	TNFAIP3
ENSDARG00000030173	65.3703	186.235	0.960478	0.000516048	1.16128	0.00041182	49.6244	31.2598	32.2295	57.5254	51.7287	89.0743	91.9816	159.519	89.8823	100.17	110.627	71.6612	58.9937	266.551	271.188	239.095	traf2a	ENSG00000127191	TRAF2
ENSDARG00000043586	112.83	222.018	4.6777	6.00183e-62	4.38861	1.41996e-42	9.92487	8.1044	2.22272	14.8172	6.08572	22.2686	11.4977	21.0934	224.278	217.036	214.341	199.628	231.859	385.114	397.266	494.871	fas	ENSG00000067182	TNFRSF1A
ENSDARG00000044619	217.98	299.964	0.962298	5.06282e-07	0.55069	0.0464838	133.986	128.513	204.49	155.144	117.657	221.572	223.682	282.124	243.966	305.854	313.445	316.077	260.67	405.019	295.769	371.616	birc2	ENSG00000023445	BIRC3
ENSDARG00000044619	217.98	299.964	0.962298	5.06282e-07	0.55069	0.0464838	133.986	128.513	204.49	155.144	117.657	221.572	223.682	282.124	243.966	305.854	313.445	316.077	260.67	405.019	295.769	371.616	birc2	ENSG00000110330	BIRC2
ENSDARG00000056582	2.68042	9.10019	-0.277831	0.839943	-0.103882	1	1.98497	0	7.77953	3.48639	1.01429	10.0209	15.6787	2.63667	1.71204	1.33561	1.53649	3.83899	4.11584	12.1159	9.51536	4.63362	arf2b	ENSG00000006062	MAP3K14
ENSDARG00000068367	97.2151	174.729	2.21701	6.32041e-27	1.73197	2.61613e-07	40.692	20.8399	33.3408	36.6071	39.5572	47.8774	78.3934	109.422	158.364	167.619	144.43	189.39	141.31	270.878	265.637	276.164	nfkbie	ENSG00000146232	NFKBIE
ENSDARG00000070606	102.512	195.202	1.50031	2.05006e-14	1.19136	9.24207e-07	45.6544	61.3619	46.6772	54.9106	57.8144	124.704	103.479	125.242	137.82	127.55	136.748	191.95	164.634	270.013	257.708	290.065	ikbke	ENSG00000263528	IKBKE
ENSDARG00000074060	182.581	392.319	2.47528	1.38606e-40	2.17801	1.00849e-26	61.5342	65.993	53.3453	57.5254	40.5715	150.313	133.791	134.47	386.066	313.867	291.165	264.891	290.853	617.048	628.807	689.483	map3k14a	ENSG00000006062	MAP3K14
ENSDARG00000091836	78.8761	134.34	2.96949	9.1195e-31	2.19316	1.12189e-08	14.8873	15.051	22.2272	18.3035	18.2572	44.5371	24.0406	68.5535	121.555	110.188	123.688	186.831	157.774	205.106	200.616	263.19	casp7	ENSG00000165806	CASP7
ENSDARG00000098696	95.8412	147.866	0.768664	0.000823243	0.872523	0.00190801	57.5643	79.8863	68.9044	79.3154	69.9858	111.343	94.072	105.467	102.723	120.205	166.709	126.687	86.4326	176.547	179.206	220.56	rela	ENSG00000173039	RELA
ENSDARG00000103021	68.3613	180.455	1.1862	1.2639e-07	0.727254	0.0196088	46.6469	45.1531	37.7863	43.5799	35.5001	126.931	165.149	112.059	120.699	71.4549	102.945	93.4155	86.4326	260.493	218.853	199.246	fadd	ENSG00000168040	FADD
ENSDARG00000103959	31.3102	58.1815	2.45342	1.62285e-07	2.39785	6.66924e-06	11.9098	4.63109	10.0022	4.35799	17.2429	23.382	15.6787	9.22836	19.6885	39.4004	69.9104	74.2205	61.7376	53.6563	166.519	80.625	pak1	ENSG00000149269	PAK1
ENSDARG00000105261	28.2259	69.6406	1.60474	1.02744e-06	1.98052	8.73344e-08	19.8497	10.4199	15.5591	11.3308	13.1857	26.7223	18.8144	35.5951	30.8168	49.4174	57.6185	38.3899	35.6706	91.735	118.942	126.034	nfkb1	ENSG00000109320	NFKB1
